# Supplementary material
Source: PubMed Central journal article supplement (PMC9906353)
Supplement: mmc1-sup1-supinfos1.pdf [file mmc1-sup1-supinfos1.pdf]

## Supplementary material

|                                                           |        |
|-----------------------------------------------------------|--------|
| Supplementary methods                                     | Page 2 |
| Figure S1. Dates of tixagevimab/cilgavimab administration | Page 3 |
| Table S1. Breakthrough infections in the control group.   | Page 4 |

## **Supplementary methods:**

### Tixagevimab/cilgavimab allocation scheme:

Tixagevimab/cilgavimab pre-exposure prophylaxis was performed through referral by the primary transplant physician after discussion of the potential risks and benefits with each individual patient. Given the initial limited supply, transplant physicians were recommended to prioritize the referral of transplant patients to receive tixagevimab/cilgavimab if they deemed them to be at high risk for breakthrough SARS-CoV-2 infection or at high risk for severe SARS-CoV-2 infection. Recommended patients to be prioritized for tixagevimab/cilgavimab pre-exposure prophylaxis included:

- Any lung transplant recipient
- Kidney transplant recipients on belatacept
- Solid organ transplant recipients who recently received B cell depletion therapy or recently received rejection treatment
- Solid organ transplant recipients who had undetectable anti-spike receptor binding domain (RBD) antibody levels after receiving three or four SARS-CoV-2 vaccines.

It is important to note that these criteria were recommended but were not strictly required.

Therefore, transplant physicians who deemed their SOTR patients to be at high risk for breakthrough or severe SARS-CoV-2 infection for other reasons were able to place referrals for tixagevimab/cilgavimab as well.

Figure S1. Dates of tixagevimab/cilgavimab administration (Dec. 2021-April 2022).

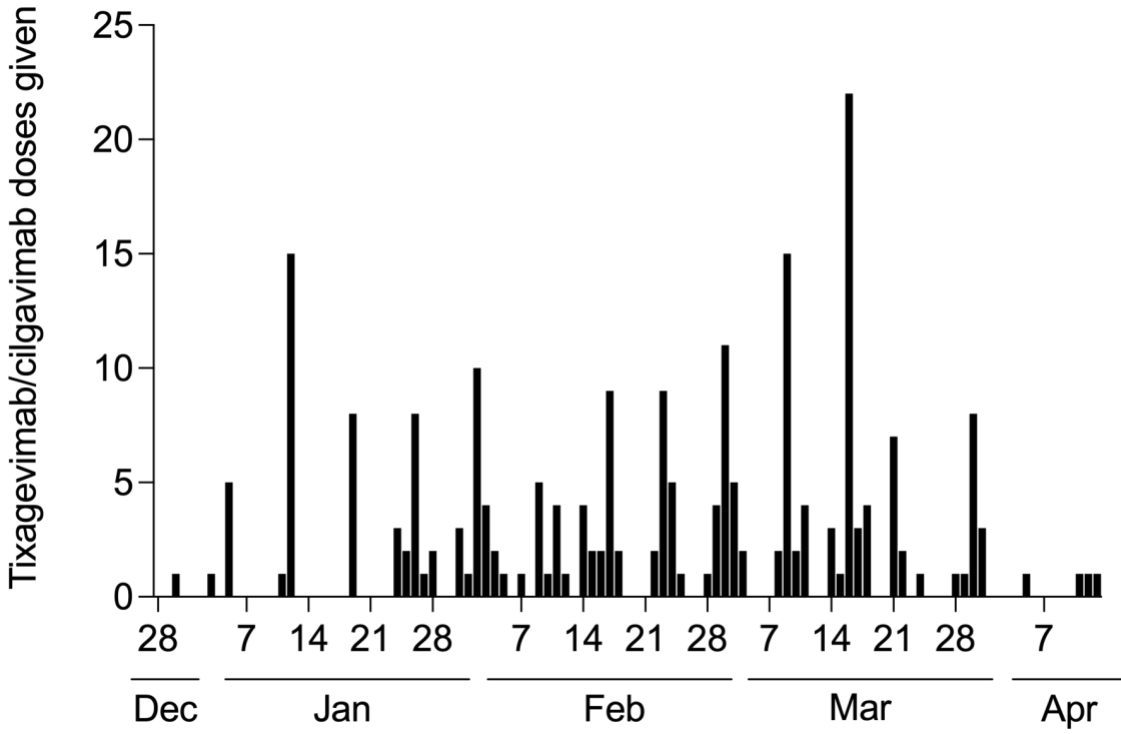

**Table S1. Breakthrough infections in the control group.**

| #  | Date of infection           | Most common variant at the time* | SOT           | No. of vaccines | Months since last vaccine | Hosp. | Treatment                  | Outcome   |
|----|-----------------------------|----------------------------------|---------------|-----------------|---------------------------|-------|----------------------------|-----------|
| 1  | Jan 11 <sup>th</sup> 2022   | B.1.1.529                        | Kidney        | 3               | 4.9                       | Yes   | Remdesivir                 | Died      |
| 2  | Jan 21 <sup>st</sup> 2022   | B.1.1.529                        | Kidney        | 3               | 4.3                       | Yes   | Remdesivir                 | Died      |
| 3  | Jan 21 <sup>st</sup> 2022   | B.1.1.529                        | Lung          | 3               | 3.6                       | No    | -                          | Recovered |
| 4  | Jan 26 <sup>th</sup> 2022   | B.1.1.529                        | Kidney        | 2               | 9.1                       | Yes   | Glucocorticoids            | Died      |
| 5  | Jan 27 <sup>th</sup> 2022   | B.1.1.529                        | Lung          | 4               | 4.9                       | No    | Sotrovimab                 | Recovered |
| 6  | Feb 1 <sup>st</sup> 2022    | B.1.1.529                        | Lung          | 4               | 5.3                       | No    | -                          | Recovered |
| 7  | Feb 8 <sup>th</sup> 2022    | B.1.1.529                        | Kidney        | 4               | 2.5                       | No    | -                          | Recovered |
| 8  | Feb 9 <sup>th</sup> 2022    | B.1.1.529                        | Lung          | 3               | 3.4                       | No    | Sotrovimab                 | Recovered |
| 9  | Feb 9 <sup>th</sup> 2022    | B.1.1.529                        | Lung          | 3               | 5.4                       | No    | Sotrovimab                 | Recovered |
| 10 | Feb 13 <sup>th</sup> 2022   | B.1.1.529                        | Liver         | 3               | 5.8                       | No    | Sotrovimab                 | Recovered |
| 11 | Feb 23 <sup>rd</sup> 2022   | B.1.1.529                        | Lung          | 3               | 5.5                       | No    | Sotrovimab                 | Recovered |
| 12 | March 9 <sup>th</sup> 2022  | B.1.1.529                        | Lung          | 2               | 6.0                       | No    | Sotrovimab                 | Recovered |
| 13 | March 28 <sup>th</sup> 2022 | BA.2                             | Lung          | 3               | 6.3                       | No    | MAB at outside institution | Recovered |
| 14 | March 30 <sup>th</sup> 2022 | BA.2                             | Lung          | 3               | 4.3                       | No    | Bebtelovimab               | Recovered |
| 15 | April 11 <sup>th</sup> 2022 | BA.2                             | Liver         | 3               | 7.4                       | No    | MAB at outside institution | Recovered |
| 16 | April 17 <sup>th</sup> 2022 | BA.2                             | Lung          | 4               | 2.5                       | No    | Bebtelovimab               | Recovered |
| 17 | April 19 <sup>th</sup> 2022 | BA.2                             | Kidney        | 4               | 1.7                       | No    | Bebtelovimab               | Recovered |
| 18 | April 21 <sup>st</sup> 2022 | BA.2                             | Kidney        | 4               | 2.0                       | No    | -                          | Recovered |
| 19 | April 26 <sup>th</sup> 2022 | BA.2                             | Kidney /Liver | 4               | 2.5                       | No    | Bebtelovimab               | Recovered |
| 20 | May 3 <sup>rd</sup> 2022    | BA.2                             | Kidney        | 4               | 2.6                       | No    | Bebtelovimab               | Recovered |
| 21 | May 3 <sup>rd</sup> 2022    | BA.2                             | Lung          | 4               | 8.5                       | No    | Bebtelovimab               | Recovered |
| 22 | May 3 <sup>rd</sup> 2022    | BA.2                             | Kidney        | 3               | 6.9                       | No    | Remdesivir                 | Recovered |
| 23 | May 4 <sup>th</sup> 2022    | BA.2                             | Lung          | 2               | 10.3                      | No    | -                          | Recovered |
| 24 | May 9 <sup>th</sup> 2022    | BA.2                             | Kidney        | 4               | 2.6                       | No    | -                          | Recovered |

|    |                              |          |                  |   |      |     |              |                     |
|----|------------------------------|----------|------------------|---|------|-----|--------------|---------------------|
| 25 | May 9 <sup>th</sup><br>2022  | BA.2     | Lung             | 4 | 8.6  | Yes | Remdesivir   | Recovered           |
| 26 | May 11 <sup>th</sup><br>2022 | BA.2     | Liver            | 4 | 3.4  | Yes | Remdesivir   | Recovered           |
| 27 | May 13 <sup>th</sup><br>2022 | BA.2     | Kidney           | 4 | 2.9  | No  | Bebtelovimab | Recovered           |
| 28 | May 16 <sup>th</sup><br>2022 | BA.2     | Lung             | 4 | 2.7  | No  | -            | Recovered           |
| 29 | May 21 <sup>st</sup><br>2022 | B.2.12.1 | Lung             | 3 | 3.2  | No  | -            | Recovered           |
| 30 | May 24 <sup>th</sup><br>2022 | B.2.12.1 | Kidney           | 2 | 14.6 | No  | -            | Recovered           |
| 31 | May 24 <sup>th</sup><br>2022 | B.2.12.1 | Lung             | 4 | 5.2  | No  | Bebtelovimab | Recovered           |
| 32 | May 25 <sup>th</sup><br>2022 | B.2.12.1 | Kidney<br>/Liver | 3 | 15.3 | Yes | Remdesivir   | Remains<br>admitted |

MAB: monoclonal antibody. SOT: solid organ transplant.

<sup>†</sup>Based on the most prevalent SARS-CoV-2 variant in region 1 (including Massachusetts) from the Center for Disease Control and Prevention COVID data tracker: <https://covid.cdc.gov/covid-data-tracker/#variant-proportions>
